# Supplementary material
Source: Springer Nature journal article supplement (https://www.springermedizin.de/resource/supplementary/12885_2009_1989_MOESM1_ESM.pdf/9460254)
Supplement: MOESM1 [file 9460254]

**HCC-diagnosis**

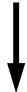

**LT AND histological diagnosis of HCC**

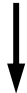

**4 – 6 weeks (mTOR-Inhibitor-free)**

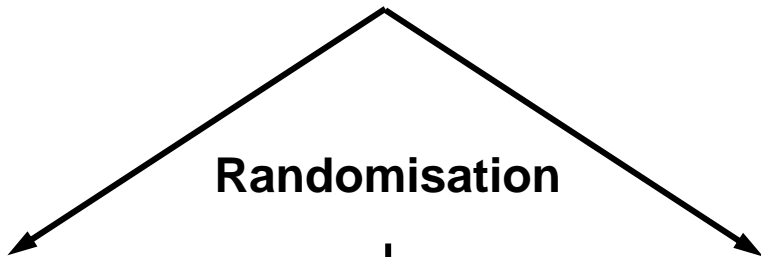

**Randomisation**

**Arm 1**

**mTORi-free IS**

**Arm 2**

**Sirolimus-  
containing IS**

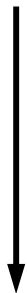

**Disease free survival (event-based analysis)**

IS=Immunosuppression
